# Supplementary material for: The Genomic Landscape of Corticotroph Tumors: From Silent Adenomas to ACTH-Secreting Carcinomas
Source: MDPI journal article supplement (doi:10.3390/ijms23094861), 2022-04-27
Supplement: s1 [file s1]

| Clinical diagnosis | Pathological diagnosis | Macro <sup>*2</sup> /<br>Micro | Max. tumoral diameter (mm) | Cav. Sinus invasion | Visual abnorm. | Preoperative Medical Tx | ACTH (pg/mL) Preop/Postop | CORTISOL (µg/dL) Preop/Postop | UFC (µg/24h) Preop/Postop | DST (µg/dL) Preop/Postop | Biochemical /Tumoral Remission | Mortality |
|--------------------|------------------------|--------------------------------|----------------------------|---------------------|----------------|-------------------------|---------------------------|-------------------------------|---------------------------|--------------------------|--------------------------------|-----------|
| Cushing Dis        | ACTH-PA                | Macro                          | 44                         | Yes                 | Yes            | None                    | 217/X                     | 48.39/40.17                   | 1428/496                  | 11.5/X                   | No/No                          | LFU       |
| Cushing Dis        | ACTH-PA                | Macro                          | 18                         | Yes                 | No             | None                    | 68/X                      | 22.85/17.95                   | 242/299                   | 12.8/0.611               | No/No                          | No        |
| Cushing Dis        | ACTH-PA                | Macro                          | 18                         | No                  | No             | None                    | 98.8/53.5                 | 15.4/10.1                     | 978.8/67.8                | 13.5/3.9                 | No/No                          | No        |
| Cushing Dis        | ACTH-PA                | Macro                          | 23                         | Yes                 | No             | None                    | 22.9/X                    | X/X                           | 245/X                     | 28.2/X                   | No/No                          | Yes       |
| Nelson Syn         | ACTH-PA                | Macro                          | 17                         | Yes                 | Yes            | RTx                     | 1386/833 <sup>*3</sup>    | X/X                           | 298/59.8 <sup>*4</sup>    | 26.3/X <sup>*4</sup>     | Yes/No                         | No        |
| Cushing Dis        | ACTH-CA                | Macro                          | 28                         | Yes                 | Yes            | RTx, TMZ, KTZ           | 60/50                     | 30/30                         | 1200/X                    | X/X                      | No/No                          | No        |
| Non Funct          | SCA                    | Macro                          | 51                         | Yes                 | Yes            | None                    | 10.4/X                    | X/1.15                        | X/X                       | X/X                      | NA/No                          | No        |
| Non Funct          | SCA                    | Macro                          | 45                         | Yes                 | Yes            | None                    | X/X                       | 11/11.49                      | X/X                       | X/X                      | NA/No                          | No        |
| Non Funct          | SCA                    | Macro                          | 31                         | Yes                 | Yes            | None                    | 41.77/X                   | 6.64/10.08                    | X/X                       | X/X                      | NA/Yes                         | No        |
| Non Funct          | CCA                    | Macro                          | 44                         | Yes                 | Yes            | None                    | X/X                       | 5.98/X                        | X/X                       | X/X                      | NA/No                          | LFU       |

F: Female, M: Male, TCS: Transcranial surgery, TSS: Transsphenoidal surgery, Sx: Surgery, UFC: Urinary Free Cortisol, DST: 1mg Dexamethasone suppression test, LFU: Lost to follow up, X: no data, TMZ: Temozolomide, KTZ: Ketoconazole, RTx: Radiotherapy, NA: not applicable

<sup>\*1</sup> Age at diagnosis

<sup>\*2</sup> Macro was defined as >10mm in any tumoral diameter

<sup>\*3</sup> after adrenalectomy; before and after 2<sup>nd</sup> TSS

<sup>\*4</sup> prior to adrenalectomy; before and after 1<sup>st</sup> TSS
