# Supplementary material for: The Genomic Landscape of Corticotroph Tumors: From Silent Adenomas to ACTH-Secreting Carcinomas
Source: MDPI journal article supplement (doi:10.3390/ijms23094861), 2022-04-27
Supplement: s1 [file s1]

# Statistical analysis from the SNVs in the corticotroph tumors

## UPS8

|                                 | WT      | Variant | p             |
|---------------------------------|---------|---------|---------------|
| <b>WHO 2017 Tumor Type</b>      |         |         |               |
| <b>Silent Corticotroph</b>      | 4       | 0       | 0.467         |
| <b>Corticotroph Adenoma</b>     | 4       | 2       |               |
| <b>Secretion</b>                |         |         | 0.082         |
| <b>Overt Cushing carcinoma</b>  | 0       | 1       |               |
| <b>Overt Cushing</b>            | 4       | 1       |               |
| <b>Silent</b>                   | 4       | 0       |               |
| <b>Tumor Size (mm) 1</b>        | 33 ± 12 | 38 ± 19 | <b>0.019*</b> |
| <b>Tumor Size (mm) 2</b>        | 38 ± 19 | 20 ± 14 | 0.267         |
| <b>Cavernous Invasion (yes)</b> | 7       | 2       | 1.00          |
| <b>Gender (female)</b>          | 7       | 2       | 1.00          |
| <b>Recurrence (yes)</b>         | 4       | 1       | 1.00          |
| <b>CNV</b>                      |         |         | 1.00          |
| Neutral/Loss                    | 5       | 1       |               |
| High/Gain                       | 3       | 1       |               |

## AURKA

|                                 | WT      | Variant | p     |
|---------------------------------|---------|---------|-------|
| <b>WHO 2017 Tumor Type</b>      |         |         |       |
| <b>Silent Corticotroph</b>      | 2       | 2       | 1.00  |
| <b>Corticotroph Adenoma</b>     | 4       | 2       |       |
| <b>Secretion</b>                |         |         | 0.287 |
| <b>Overt Cushing carcinoma</b>  | 0       | 1       |       |
| <b>Overt Cushing</b>            | 4       | 1       |       |
| <b>Silent</b>                   | 2       | 2       |       |
| <b>Tumor Size (mm) 1</b>        | 30 ± 11 | 30 ± 14 | 1.00  |
| <b>Tumor Size (mm) 2</b>        | 33 ± 20 | 35 ± 21 | 0.903 |
| <b>Cavernous Invasion (yes)</b> | 6       | 3       | 0.40  |
| <b>Gender (female)</b>          | 5       | 4       | 1.00  |
| <b>Recurrence (yes)</b>         | 2       | 3       | 0.524 |
| <b>CNV</b>                      |         |         | 0.571 |
| Neutral/Loss                    | 3       | 3       |       |
| High/Gain                       | 3       | 1       |       |

## TP53

|                                 | WT     | Variant | p     |
|---------------------------------|--------|---------|-------|
| <b>WHO 2017 Tumor Type</b>      |        |         |       |
| <b>Silent Corticotroph</b>      | 1      | 3       | 0.400 |
| <b>Corticotroph Adenoma</b>     | 0      | 6       |       |
| <b>Secretion</b>                |        |         | 0.435 |
| <b>Overt Cushing carcinoma</b>  | 0      | 1       |       |
| <b>Overt Cushing</b>            | 0      | 5       |       |
| <b>Silent</b>                   | 1      | 3       |       |
| <b>Tumor Size (mm) 1</b>        | 40 ± 0 | 29 ± 12 | 0.393 |
| <b>Tumor Size (mm) 2</b>        | 50 ± 0 | 32 ± 19 | 0.406 |
| <b>Cavernous Invasion (yes)</b> | 1      | 8       | 1.00  |
| <b>Gender (female)</b>          | 1      | 8       | 1.00  |

|                         |   |   |       |
|-------------------------|---|---|-------|
| <b>Recurrence (yes)</b> | 1 | 4 | 1.00  |
| <b>CNV</b>              |   |   | 0.400 |
| Neutral/Loss            | 0 | 6 |       |
| High/Gain               | 1 | 3 |       |

HSD3B1 = no hay diferencias porque es una constante (todo esta mutado)

#### EGFR

|                                 | WT      | Variant | p     |
|---------------------------------|---------|---------|-------|
| <b>WHO 2017 Tumor Type</b>      |         |         |       |
| <b>Silent Corticotroph</b>      | 1       | 3       |       |
| <b>Corticotroph Adenoma</b>     | 3       | 3       | 0.571 |
| <b>Secretion</b>                |         |         |       |
| <b>Overt Cushing carcinoma</b>  | 0       | 1       |       |
| <b>Overt Cushing</b>            | 3       | 2       | 0.392 |
| <b>Silent</b>                   | 1       | 3       |       |
| <b>Tumor Size (mm) 1</b>        | 33 ± 15 | 28 ± 10 | 0.646 |
| <b>Tumor Size (mm) 2</b>        | 33 ± 26 | 35 ± 15 | 0.871 |
| <b>Cavernous Invasion (yes)</b> | 3       | 6       | 0.400 |
| <b>Gender (female)</b>          | 4       | 5       | 1.00  |
| <b>Recurrence (yes)</b>         | 2       | 3       | 1.00  |
| <b>CNV</b>                      |         |         | 0.571 |
| Neutral/Loss                    | 3       | 3       |       |
| High/Gain                       | 1       | 3       |       |

#### CDKN1A

|                                 | WT      | Variant | p             |
|---------------------------------|---------|---------|---------------|
| <b>WHO 2017 Tumor Type</b>      |         |         |               |
| <b>Silent Corticotroph</b>      | 0       | 4       |               |
| <b>Corticotroph Adenoma</b>     | 4       | 2       | 0.076         |
| <b>Secretion</b>                |         |         |               |
| <b>Overt Cushing carcinoma</b>  | 0       | 1       |               |
| <b>Overt Cushing</b>            | 4       | 1       | <b>0.036*</b> |
| <b>Silent</b>                   | 0       | 4       |               |
| <b>Tumor Size (mm) 1</b>        | 25 ± 10 | 33 ± 12 | 0.272         |
| <b>Tumor Size (mm) 2</b>        | 25 ± 20 | 40 ± 18 | 0.258         |
| <b>Cavernous Invasion (yes)</b> | 3       | 6       | 0.400         |
| <b>Gender (female)</b>          | 4       | 5       | 1.00          |
| <b>Recurrence (yes)</b>         | 2       | 3       | 1.00          |
| <b>CNV</b>                      |         |         | 0.571         |
| Neutral/Loss                    | 3       | 3       |               |
| High/Gain                       | 1       | 3       |               |
